# Supplementary material
Source: PubMed Central journal article supplement (PMC5012484)
Supplement: CJN.09050815SupplementaryData.pdf [file CJN.09050815SupplementaryData.pdf]

# **Effect of Tenapanor on Interdialytic Weight Gain in Patients on Hemodialysis**

Geoffrey A. Block MD,<sup>\*</sup> David P. Rosenbaum PhD,<sup>†</sup> Maria Leonsson-Zachrisson MD,<sup>‡</sup>  
Bergur V. Stefansson MD,<sup>‡</sup> Tina Rydén-Bergsten MSc,<sup>‡</sup> Peter J. Greasley PhD,<sup>‡</sup> Susanne A.  
Johansson MSc,<sup>‡</sup> Mikael Knutsson PhD,<sup>‡</sup> and Björn C. Carlsson MD<sup>‡</sup>

<sup>\*</sup>Denver Nephrology, Denver, Colorado

<sup>†</sup>Ardelyx Inc., Fremont, California

<sup>‡</sup>AstraZeneca R&D, Mölndal, Sweden

## **Supplementary Material**

# Supplementary Material 1

Interdialytic weight gain across the study period for the in-patient cohort

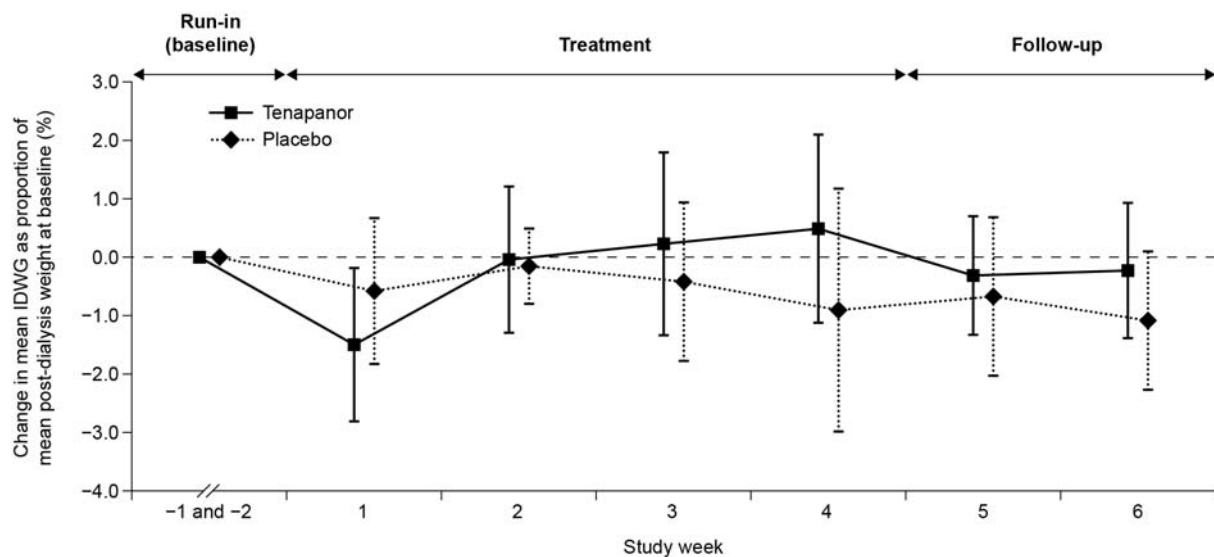

|           | Absolute mean IDWG (kg) |         |         |         |         |         |         |
|-----------|-------------------------|---------|---------|---------|---------|---------|---------|
|           | Baseline                | Week 1  | Week 2  | Week 3  | Week 4  | Week 5  | Week 6  |
| Tenapanor | 3.5±0.6                 | 2.0±1.2 | 3.3±1.1 | 3.6±1.3 | 3.8±1.3 | 3.1±0.9 | 3.2±1.2 |
| <i>n</i>  | 8                       | 8       | 8       | 8       | 8       | 8       | 8       |
| Placebo   | 4.1±1.1                 | 3.7±1.9 | 3.9±0.9 | 4.0±1.7 | 3.6±1.8 | 3.7±1.6 | 3.4±1.4 |
| <i>n</i>  | 8                       | 8       | 8       | 8       | 8       | 8       | 8       |

Values are mean±standard deviation, offset for clarity, in line graph. Absolute mean weekly IDWG is shown as mean±standard deviation. IDWG, interdialytic weight gain.

## Supplementary Material 2

Proportions of patients achieving specific thresholds of IDWG reductions (out-patient cohort)

| IDWG reduction threshold | Week | Treatment group              |                            |
|--------------------------|------|------------------------------|----------------------------|
|                          |      | Tenapanor ( <i>n</i> =37), % | Placebo ( <i>n</i> =35), % |
| ≥ 0.25 kg                | 1    | 51                           | 43                         |
|                          | 2    | 54                           | 40                         |
|                          | 3    | 57                           | 34                         |
|                          | 4    | 46                           | 46                         |
| ≥ 0.50 kg                | 1    | 32                           | 29                         |
|                          | 2    | 32                           | 29                         |
|                          | 3    | 43                           | 23                         |
|                          | 4    | 32                           | 23                         |
| ≥ 0.75 kg                | 1    | 22                           | 26                         |
|                          | 2    | 24                           | 17                         |
|                          | 3    | 32                           | 11                         |
|                          | 4    | 22                           | 20                         |
